# Supplementary material for: Molecular Characterization of a Date Palm Vascular Highway 1-Interacting Kinase (PdVIK) under Abiotic Stresses
Source: MDPI journal article supplement (doi:10.3390/genes11050568), 2020-05-19
Supplement: s1 [file s1]

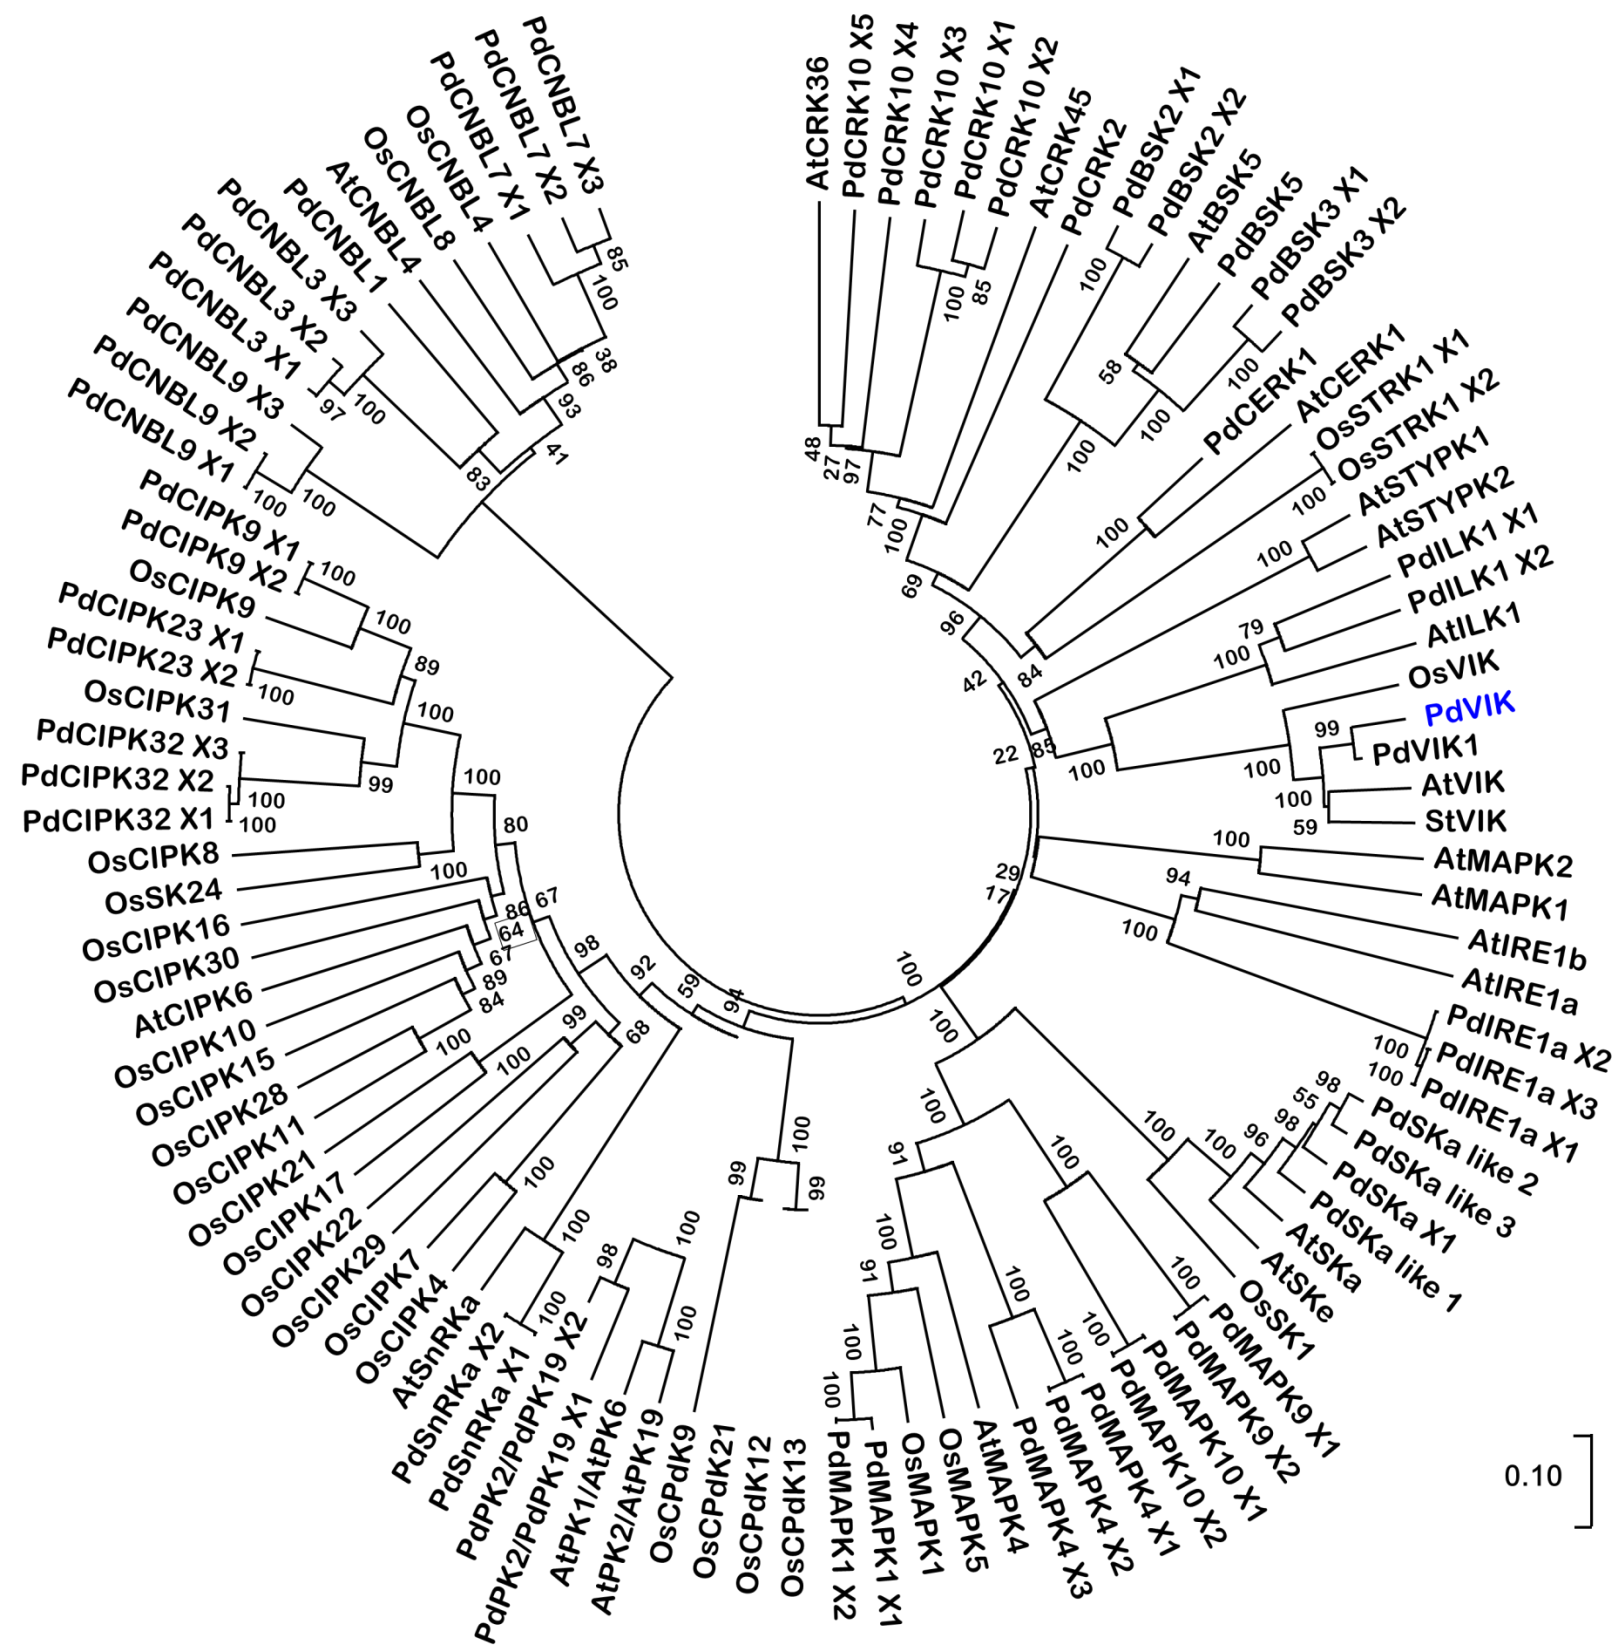

**Figure S1**

[illegible]

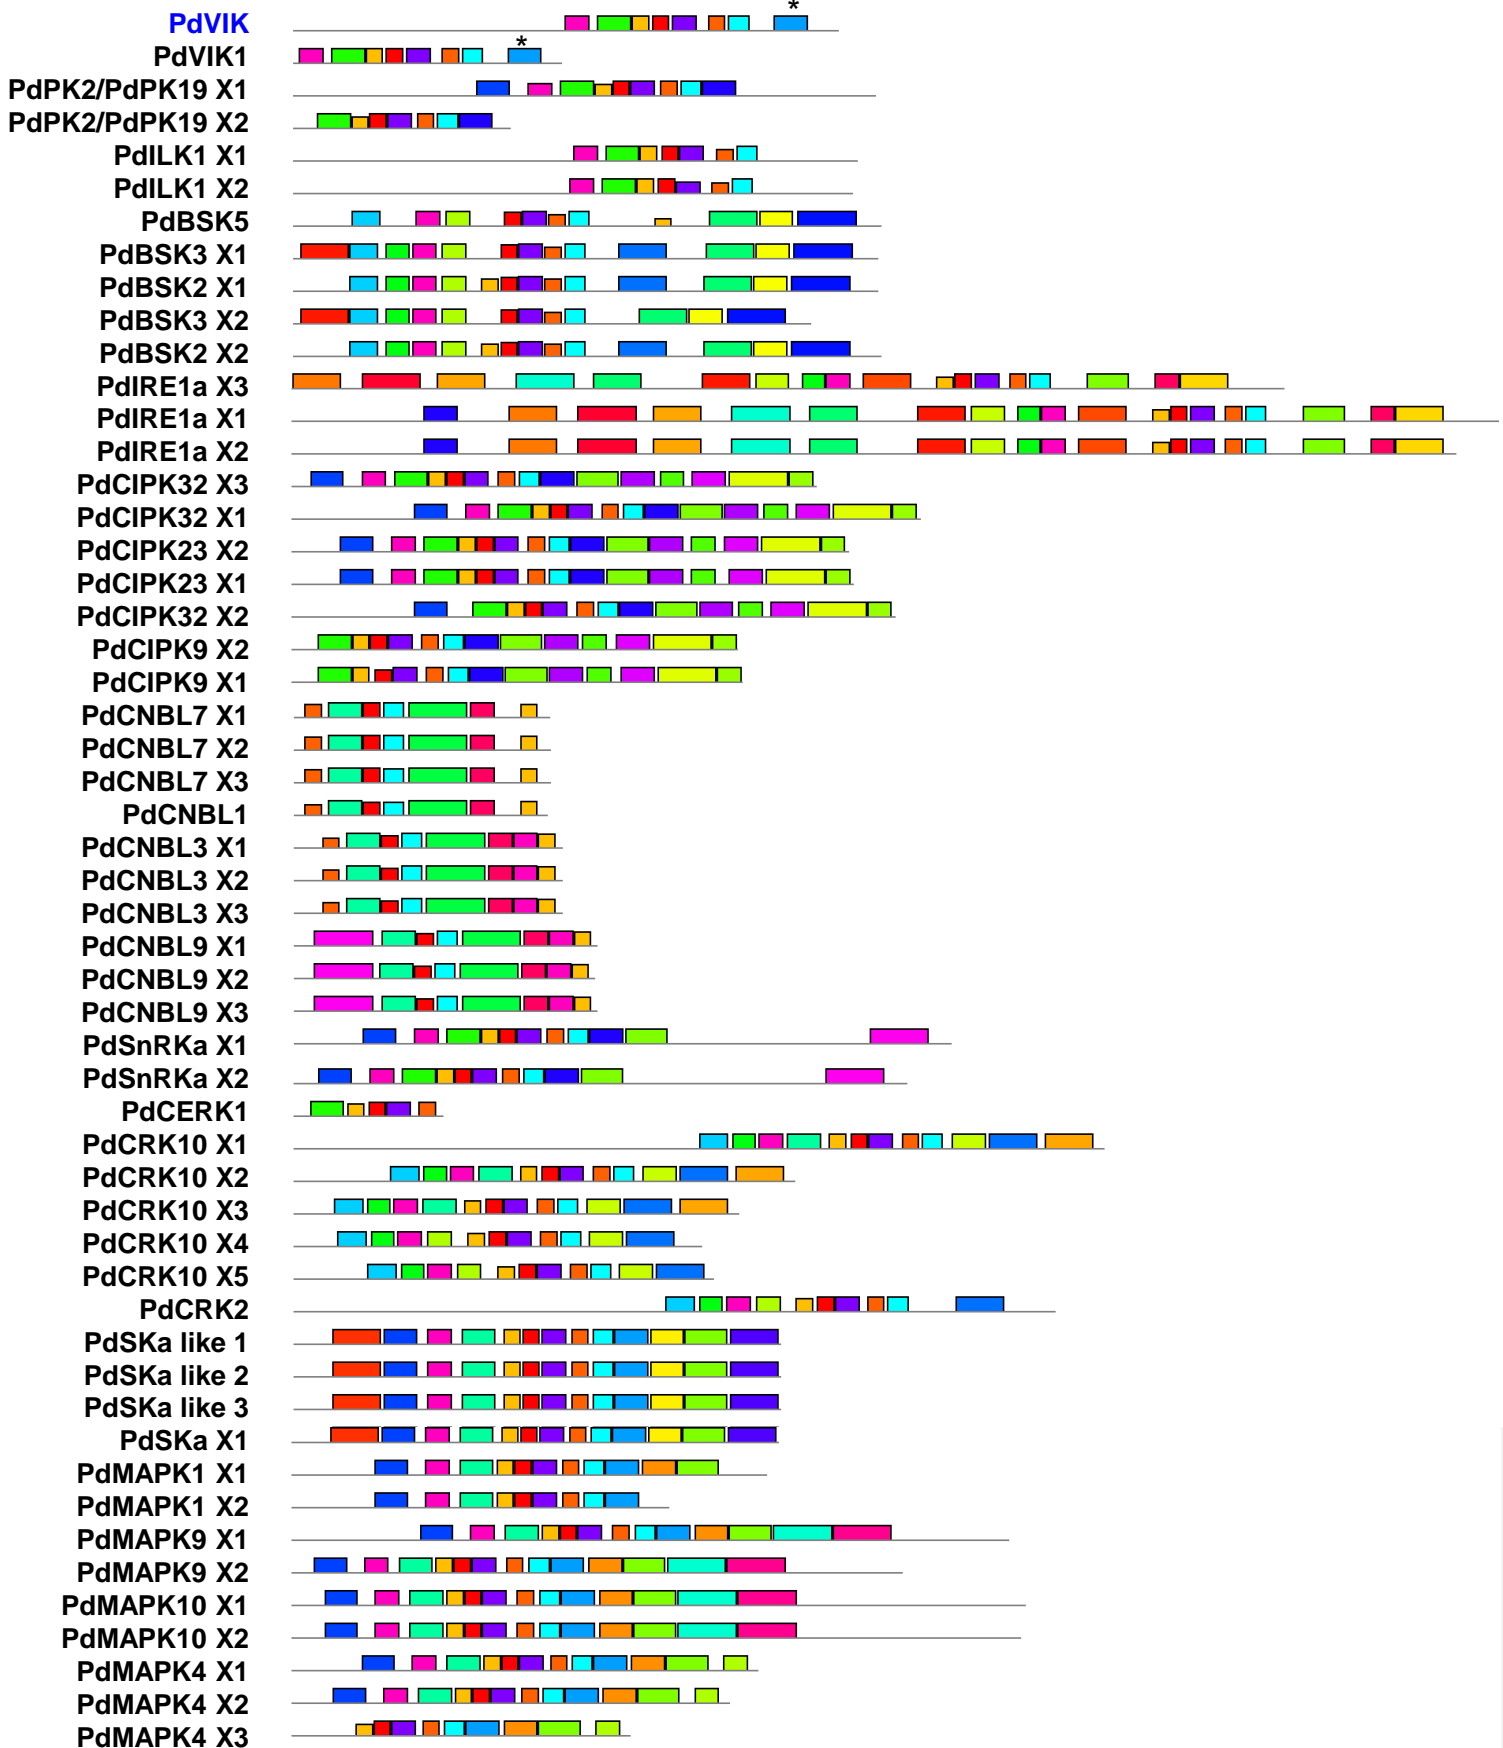

**Figure S3**



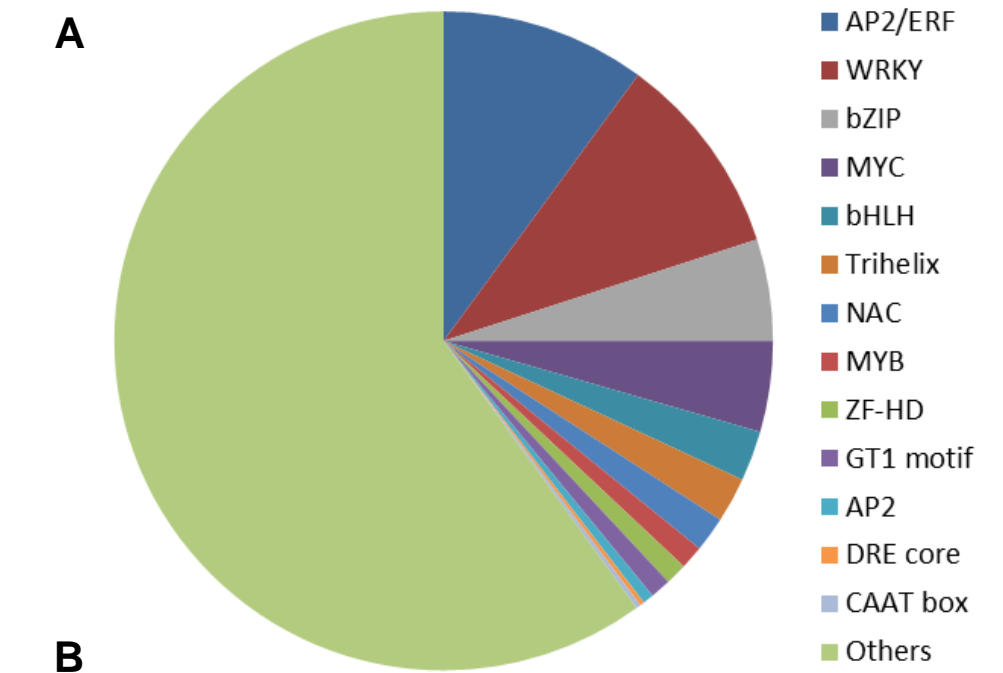

+ TGTGACTCT TTTGGATGTA CTCATACTAG ATATGTATGA TTTGTCTATC TTAGCAAAAT AAAAATAAAA  
 - ACAACTGAGA AAACCTACAT GAGTATGATC TATACATACT AAACAGATAG AATCGTTTTA TTTTATTATT

+ ATAATGAATT TTTATTAGAA TAATTTTAA TCAATTTATT AGCTAAACAT ATTTTAGAGA ATCACTTAAT  
 - TATTACTTAA AAATAATCTT ATTAAAAATT AGTTAAATAA TCGATTTGTA TAAAATCTCT TAGTGAATTA

+ CAAAAAATA AGTCAATAAT TTTCAAATAA ATTAAGCATT TTCACAAAAA AATGCAGGTT CATTCATAAC  
 - GTTTTTTTAT TCAGTTATTA AAAGTTTATT TAATTCGTAA AAGTGTTTTT TTACGTCCAA GTAAGATTG

+ TTTTATTAGT CTAATTTTGA AGCACTAGAG TCTTGATGCT AGACAAGATC AAATCAAGGG TAGCTAATGC  
 - AAAATAATCA GATTAATACT TCGTGATCTC AGAACTACGA TCTGTTCTAG TTTAGTTCCC ATCGATTACG

+ AAAAGTTAAT AATGAAAGAG CGAATTGATC CGATGAGATC AGCTCAAGAA AGAAAATAAT AACCAAGATTG  
 - TTTTCAATTA TTACTTTCTC GCTTAACTAG GCTACTCTAG TCGAGTTCTT TCTTTTATTA TTGGTCTAAC

+ TGACAAAATT CTATCAAAAT GTAGTGGATA CCATGTCTTT TCTTCCTTTA TACCATATGA AATATCCACA  
 - ACTGTTTTAA GAATAGTTTA CATCACCTAT GGTACAGAAA AGAAGGAAAT ATGGTATACT TTATAGGTGT

+ TGTAATAAAA TTTGGACAAT CCCTATATTT TTTTCTCTTT ACTCACCCAA GACCCAACTT GTCTTTTTAT  
 - ACATTATTTT AAACCTGTTA GGGATATAAA AAAAGAGAAA TGAGTGGGT CTGGGTGAA CAGAAAAATA

+ TTTTTTTTCC GGAACATACA ATACATTTTC AAATGCAACA TTATGTGTAT TATTTACCAT ATTTACTACA  
 - AAAAAAAGG CCTGTATGT TATGTAAAAG TTTACGTTGT AATACACATA ATAAATGGTA TAAATGATGT

+ TTAGTCTGAT CAGAAGTCTA ACCTGCATTA TGTTCGGTA TGCAACGTAT TTTATTCAAT CTACAAAAAC  
 - AATCAGACTA GTCTTCAGAT TGGACGTAAT ACAAAGCCAT ACGTTGCATA AAATAAGTTA GATGTTTTTG

+ CAGAAAGTTA AACGGAATAT ATTTGTGGAC TCCTACGTCA CAAGGCGTTT GCCGACAAC TACCGGGACC  
 - GTCTTTCAAT TTGCCTTATA TAAACACCTG AGGATGCAGT GTCCGCAAA CGGCTGTGA ATGGCCCTGG

+ CACCCCTCT CCGTCTCCC AAGCCGTAGC AAGAGCGAGT CAGAACTCCA AAACAAACCT TGAGCACGAG  
 - GTGGGGGAGA GGCAGGAGGG TTCGGCATCG TTCTCGCTCA GTCTTGAGGT TTTGTTGGA ACTCGTGCTC

+ GACTGGATGG CGGATCTGA TCCGCCGACC AGGTCGACTC GGCCGACTCC CGAGGCGGCG CGAGACGCCG  
 - CTGACCTACC GCCTAGAACT AGGCGGCTGG TCCAGCTGAG CCGGCTGAGG GCTCCGCCG GCTCTGCGCG

+ ACCATTAACC GAACCGAAGC AAAGGCAAAA GATATTTTTC TATCTTCTTG GAGGGCATCT TCGAGGCAAA  
 - TGGTAATTGG CTTGGCTTCG TTTCCGTTTT CTATAAAAAG ATAGAAGAAC CTCCCGTAGA AGCTCCGTTT

+ ATAAAAACAG TAGAGGGTTG CTCCCTGCGG AGCCTCAGC  
 - TATTTTGTG ATCTCCAAC GAGGGACGCC TCGGAGTCG

CAAT box  
 DRE Core  
 GT1 motif  
 MYB  
 MYC  
 AP2

**Figure S4**

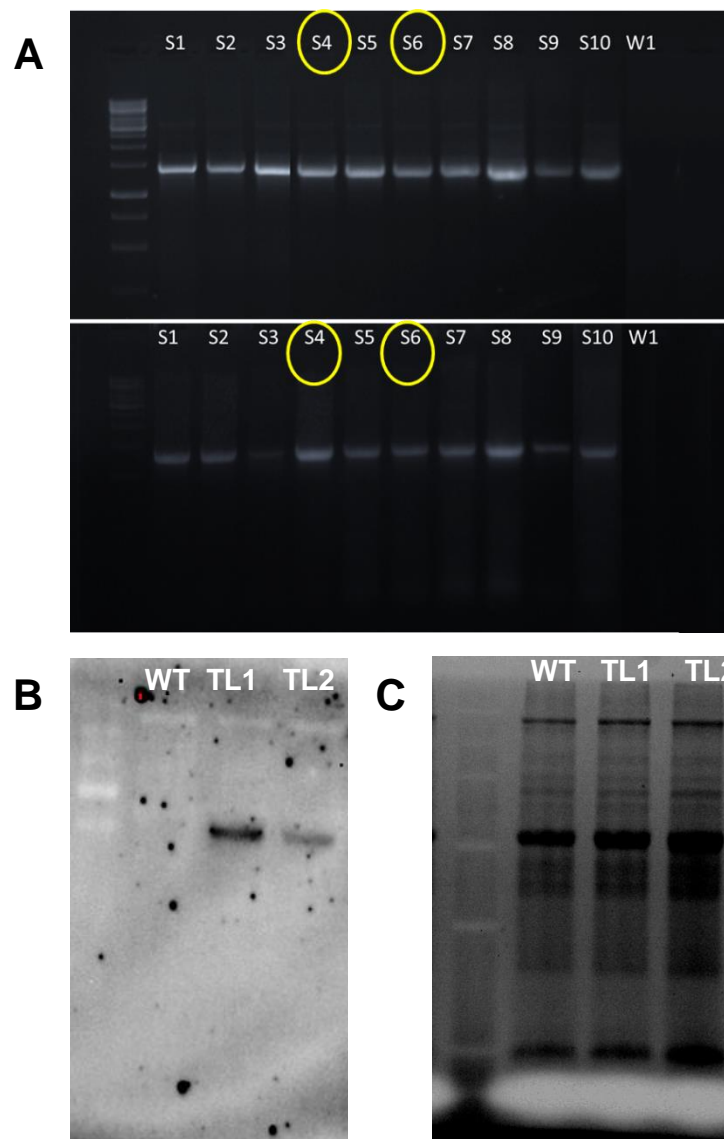

**Figure S5**
